# Supplementary material for: Luminescent gold–thallium derivatives with a pyridine-containing 12-membered aza-thioether macrocycle
Source: Royal Society of Chemistry journal article supplement (doi:10.1039/d1dt01599k), 2021-01-01
Supplement: d1dt01599k1.pdf [file d1dt01599k1.pdf]

## Electronic Supporting Information (ESI)

### Luminescent Gold-Thallium Derivatives with a Pyridine-Containing 12-Membered Aza-Thioether Macrocycle

Francesco Caddeo,<sup>a</sup> Vanesa Fernández-Moreira,<sup>a</sup> Massimiliano Arca,<sup>b</sup> Anna Pintus,<sup>b</sup> Antonio Laguna,<sup>a</sup> Vito Lippolis,<sup>b\*</sup> M. Concepción Gimeno<sup>a\*</sup>

<sup>a</sup> Departamento de Química Inorgánica, Instituto de Síntesis Química y Catálisis Homogénea (ISQCH), CSIC-Universidad de Zaragoza, 50009 Zaragoza, Spain.

<sup>b</sup> Dipartimento di Scienze Chimiche e Geologiche Universit/ degli Studi di Cagliari S.S. 554 Bivio per Sestu, 09042 Monserrato (CA) (Italy)

#### Table of contents

|                                                                                                                                                                                                          | <u>Page</u> |
|----------------------------------------------------------------------------------------------------------------------------------------------------------------------------------------------------------|-------------|
| <b>Figure S1.</b> <sup>1</sup> H and <sup>13</sup> C NMR of complex <b>1</b>                                                                                                                             | 2           |
| <b>Figure S2.</b> <sup>1</sup> H and <sup>13</sup> C NMR of complex <b>2</b>                                                                                                                             | 3           |
| <b>Figure S3.</b> <sup>1</sup> H and <sup>13</sup> C NMR of complex <b>3</b>                                                                                                                             | 5           |
| <b>Figure S4.</b> <sup>1</sup> H and <sup>13</sup> C NMR of complex <b>4</b>                                                                                                                             | 5           |
| <b>Figure S5.</b> Normalised emission and excitation spectra of <b>3</b> at 77 K                                                                                                                         | 6           |
| <b>Figure S6.</b> Emission spectra of <b>4</b> recorded at different excitation wavelengths (77 K)                                                                                                       | 6           |
| <b>Figure S7.</b> Molecular drawing and atom labelling scheme for the oligomeric portion {LTl <sub>2</sub> [Au(C <sub>6</sub> F <sub>5</sub> ) <sub>2</sub> ] <sub>2</sub> } <sub>3</sub> ( <b>4'</b> ). | 7           |
| <b>Figure S8.</b> Drawing of selected frontier Kohn-Sham molecular orbitals involved in monoelectronic excitations calculated for compound <b>4'</b> at TD-DFT level.                                    | 8-9         |
| <b>Table S1.</b> Geometry used for the DFT calculations.                                                                                                                                                 | 9-12        |
| <b>Table S2.</b> Selected NBO charges                                                                                                                                                                    | 13          |

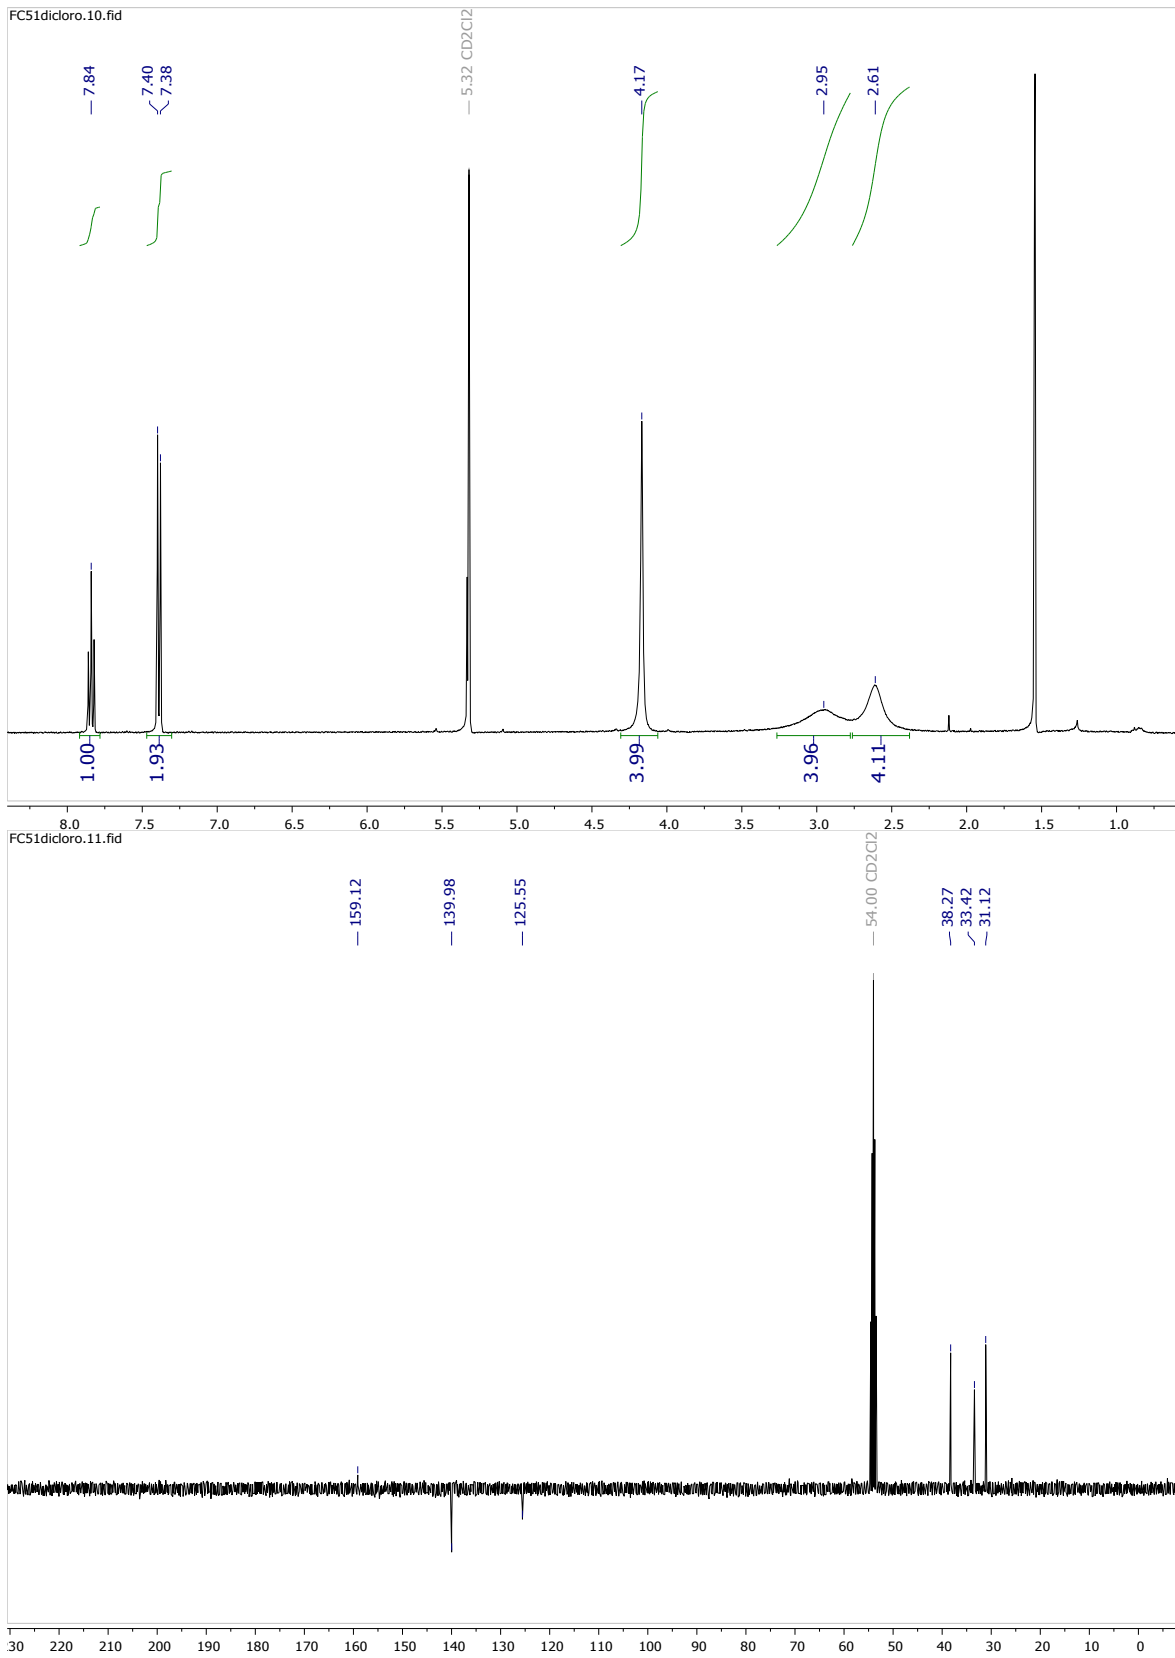

Figure S1.  $^1\text{H}$  and  $^{13}\text{C}$ -NMR of complex 1

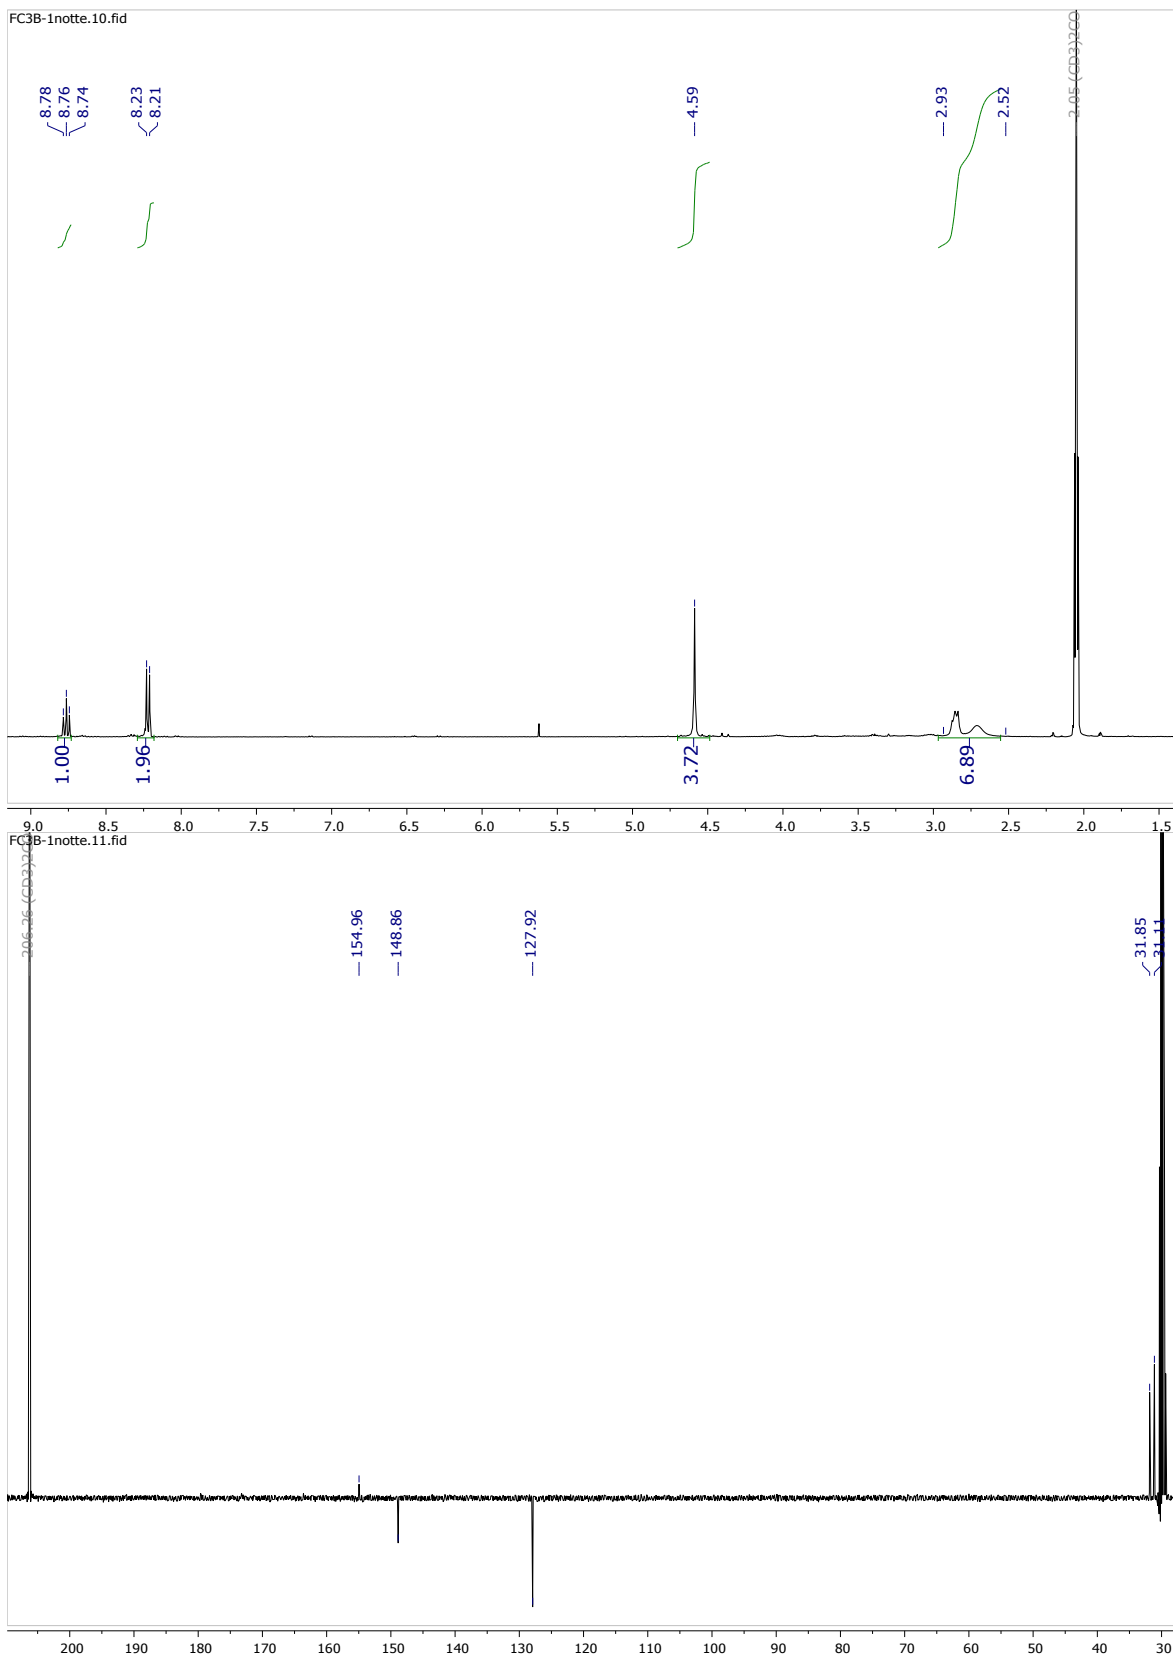

Figure S2.  $^1\text{H}$  and  $^{13}\text{C}$ -NMR of complex 2

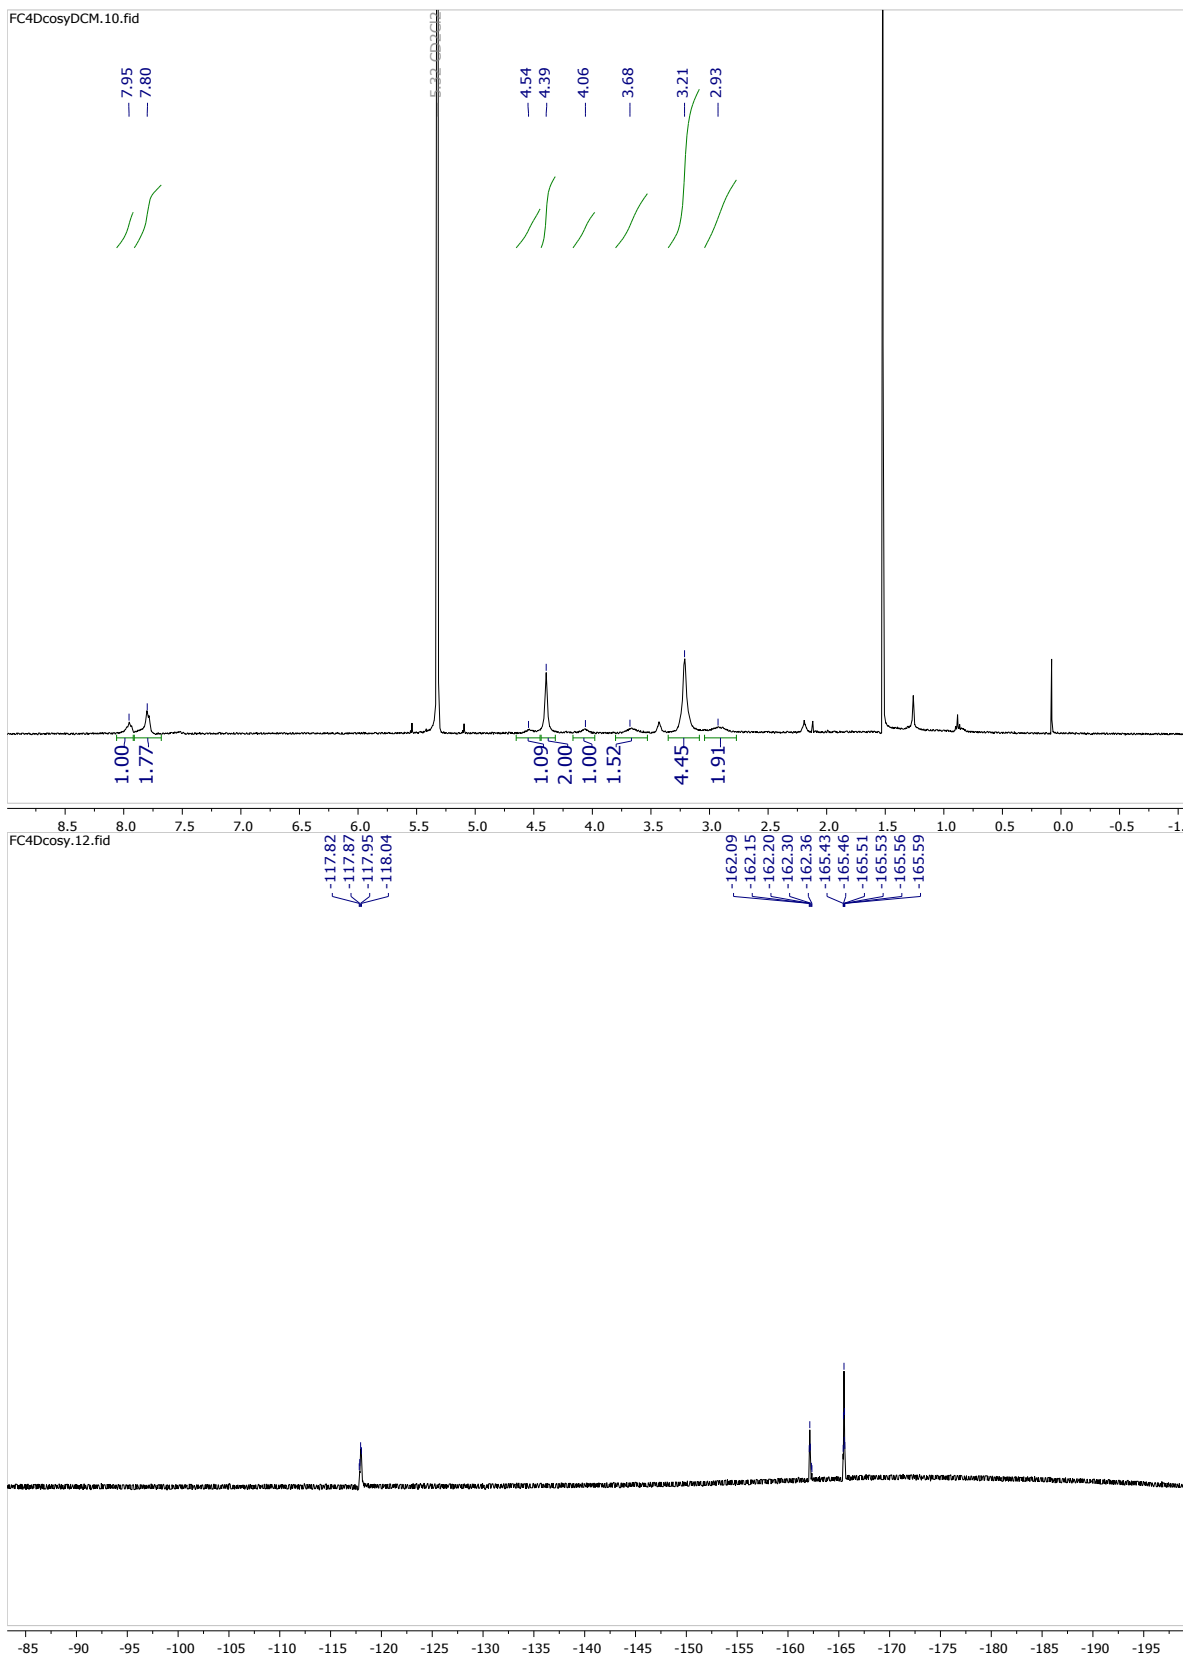

Figure S3.  $^1\text{H}$  and  $^{19}\text{F}$ -NMR of complex 3

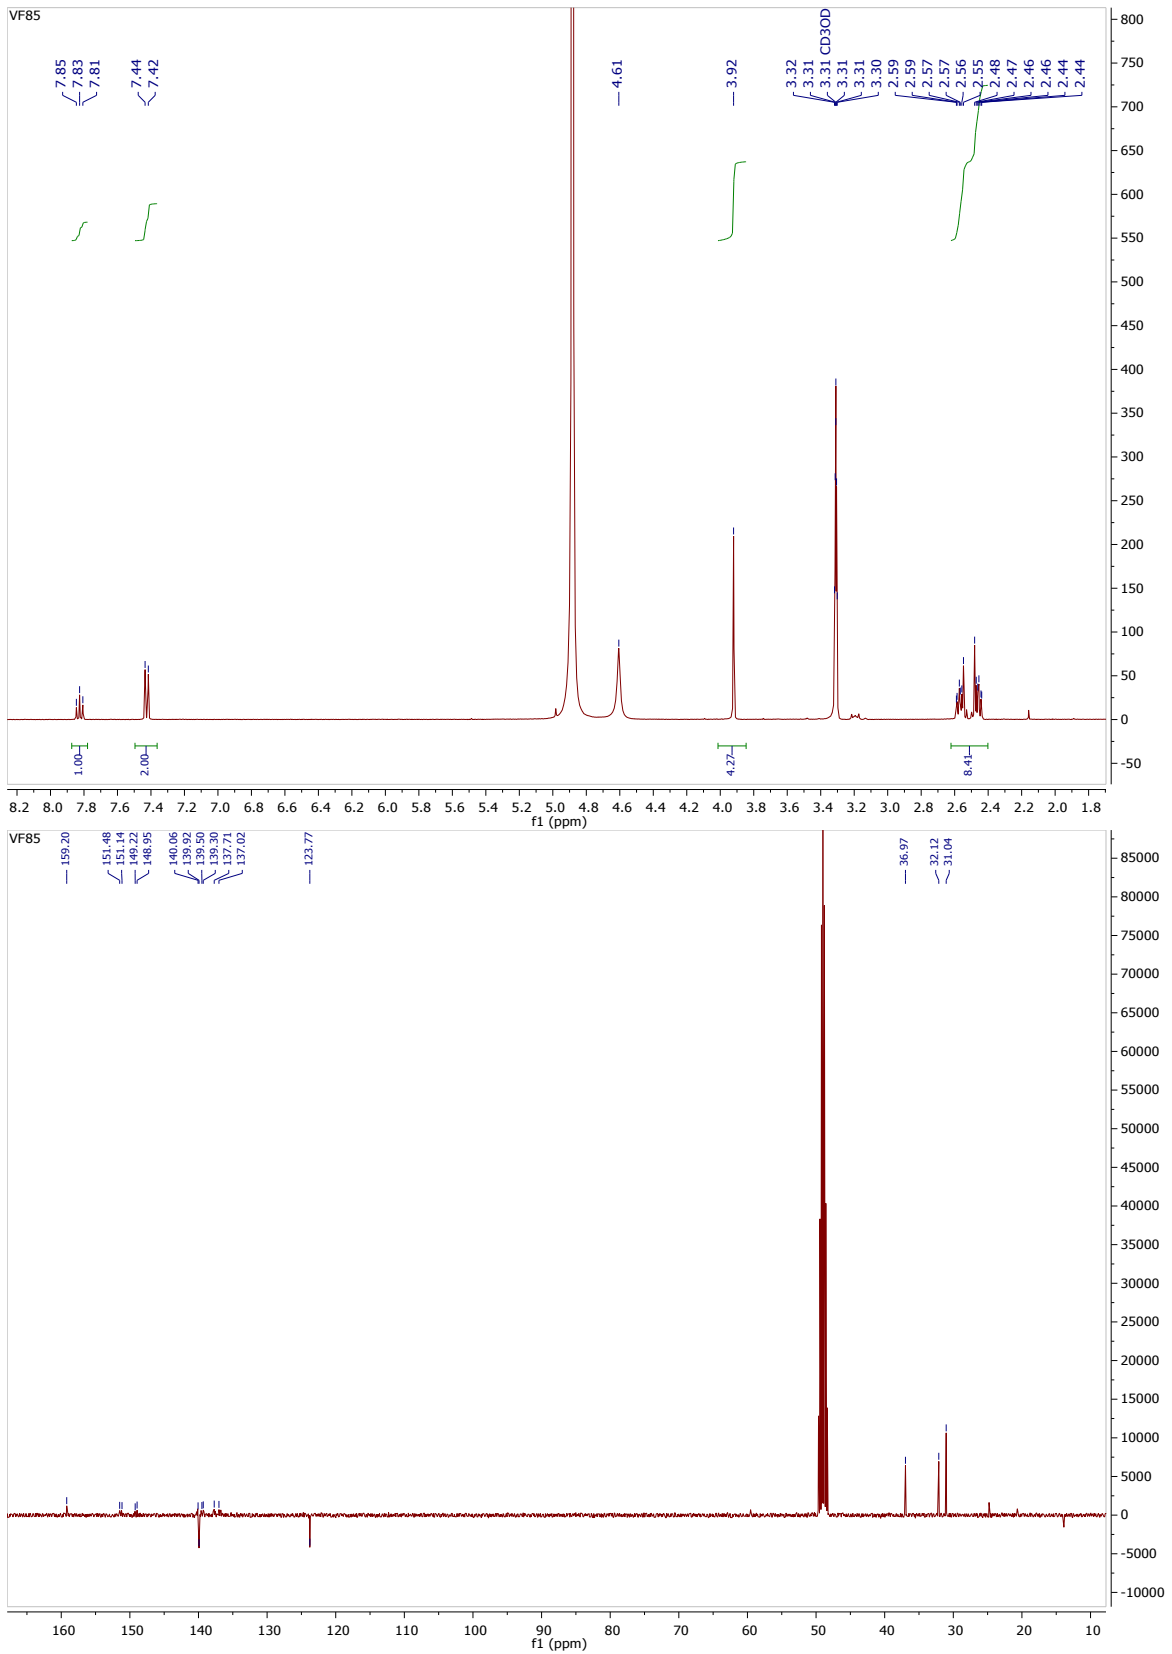

Figure S4.  $^1\text{H}$  and  $^{13}\text{C}$ -NMR of complex 4

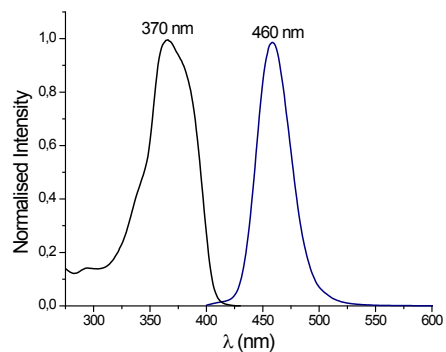

**Figure S5.** Emission and excitation spectra of **3** recorded at in solid state at 77 K.

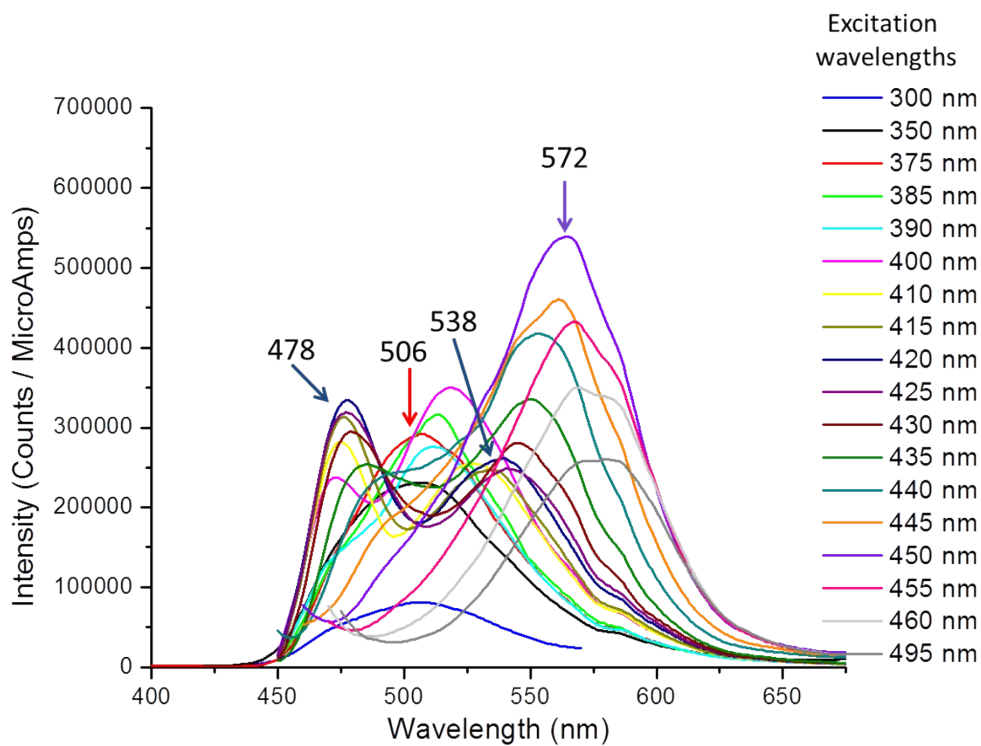

**Figure S6.** Emission spectra of **4** recorded at different excitation wavelengths (77 K)

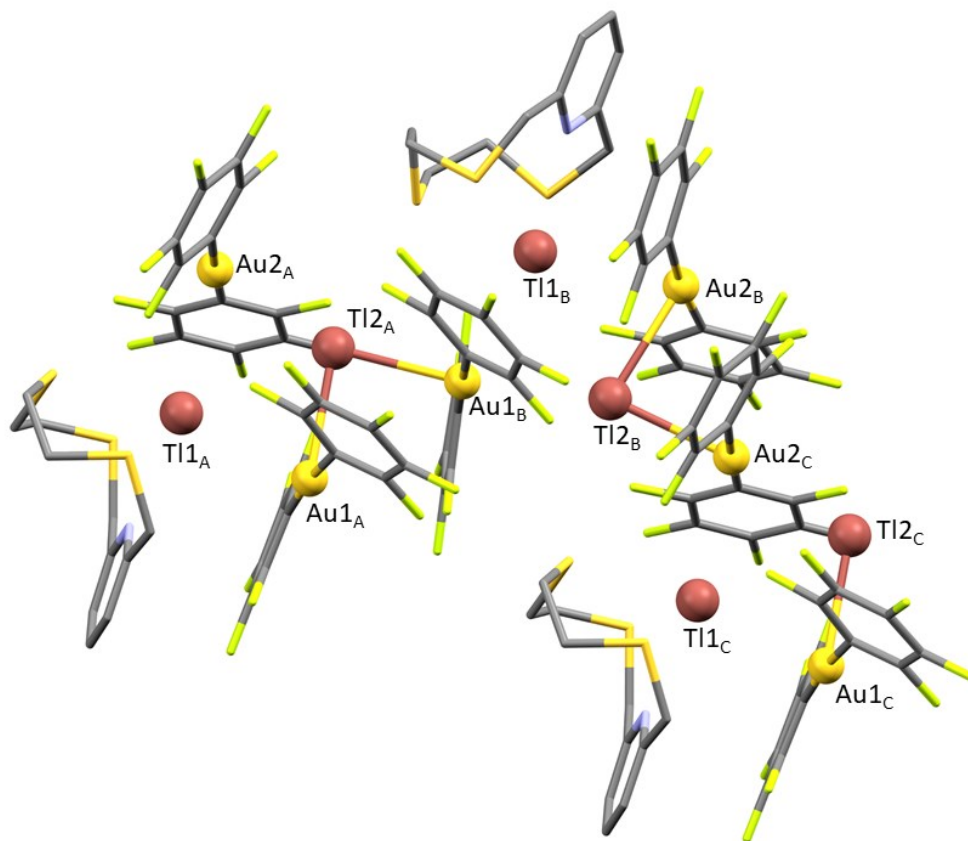

**Figure S7.** Molecular drawing and atom labelling scheme for the oligomeric portion  $\{\text{LTl}_2[\text{Au}(\text{C}_6\text{F}_5)_2]_2\}_3$  (**4'**), selected as model for **4** for DFT calculations.

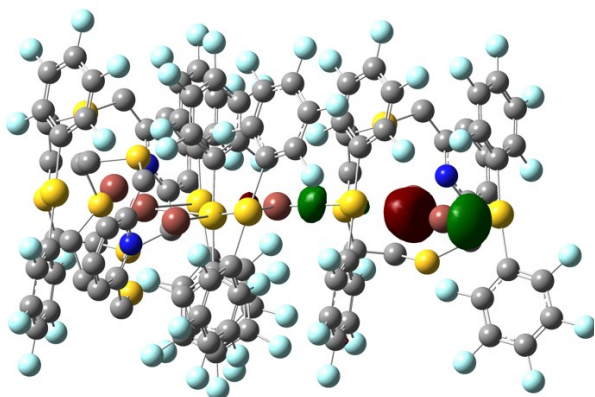

811 (LUMO)

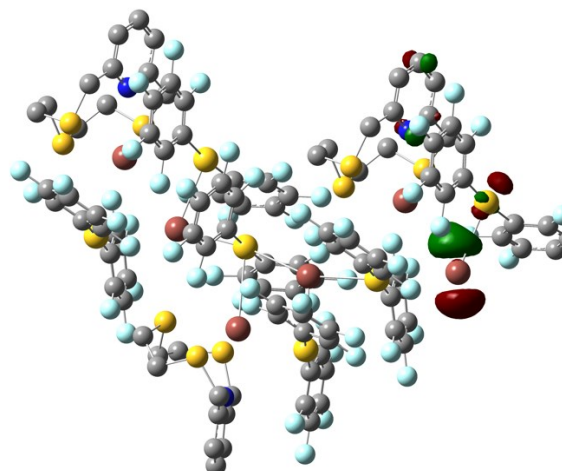

814 (LUMO+3)

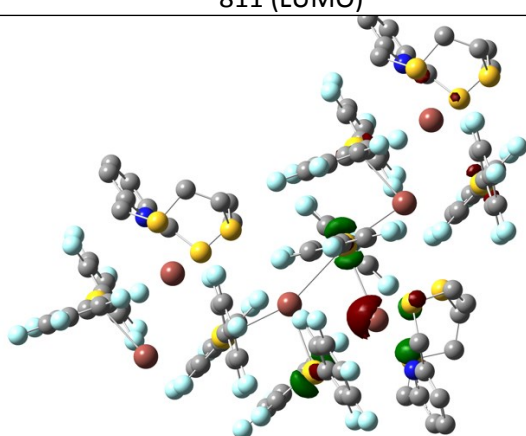

809 (HOMO-1)

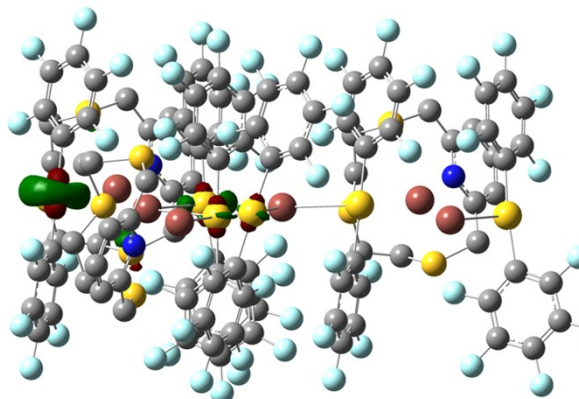

810 (HOMO)

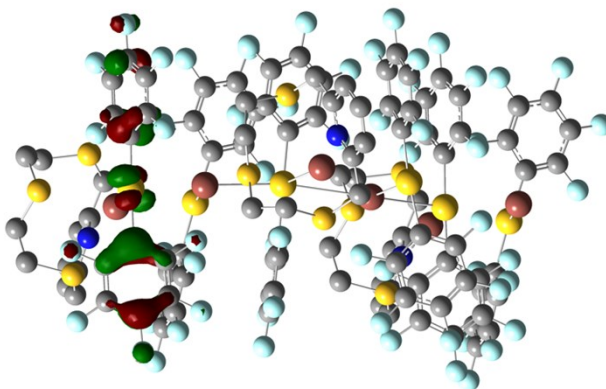

807 (HOMO-3)

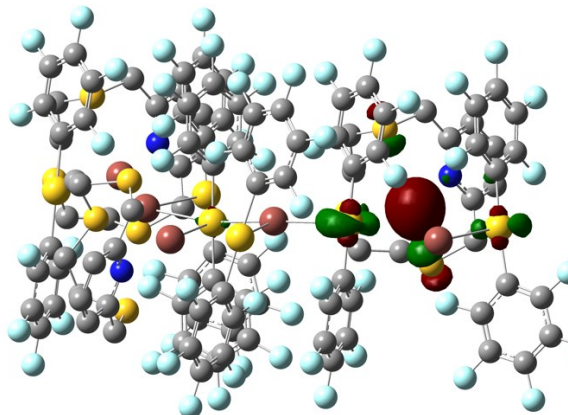

808 (HOMO-2)



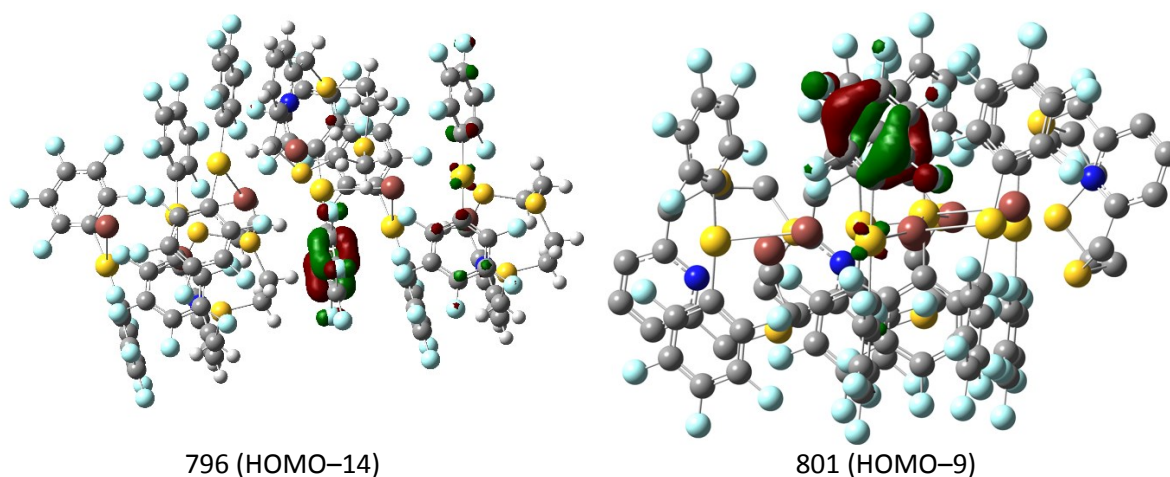

**Figure S8.** Drawing of selected frontier Kohn-Sham molecular orbitals involved in mono-electronic excitations calculated for compound **4'** at TD-DFT level (see Table 3 in the text). The absolute ordering number of each MO is reported (in parentheses as referred to HOMO and LUMO for occupied and virtual MOs, respectively). Hydrogen atoms have been omitted for clarity. Cutoff value = 0.05 |e|.

**Table S1.** Geometry used for the DFT calculations on oligomeric portion **4'** in orthogonal Cartesian coordinate format (total charge = 0, spin multiplicity = 1; Z = atomic number).

| Atom number | Z  | x         | y         | z         | Atom number | Z  | x         | y         | z         |
|-------------|----|-----------|-----------|-----------|-------------|----|-----------|-----------|-----------|
| 1           | 79 | 3.854015  | -2.570436 | -1.165593 | 118         | 6  | -4.713105 | -5.853624 | 0.306121  |
| 2           | 79 | 7.664002  | 0.894943  | 0.485121  | 119         | 6  | -4.775200 | -7.230847 | 0.169245  |
| 3           | 81 | 7.161715  | -2.272556 | -0.618170 | 120         | 1  | -4.583422 | -7.799971 | 0.905329  |
| 4           | 6  | 3.269831  | -1.595084 | -2.865670 | 121         | 6  | -5.117635 | -7.757770 | -1.049588 |
| 5           | 6  | 1.952221  | -1.657353 | -3.265685 | 122         | 1  | -5.138924 | -8.697919 | -1.174879 |
| 6           | 6  | 1.469051  | -1.071120 | -4.435090 | 123         | 6  | -5.430964 | -6.908819 | -2.090669 |
| 7           | 6  | 2.341104  | -0.425301 | -5.261820 | 124         | 1  | -5.670584 | -7.259267 | -2.940980 |
| 8           | 6  | 3.682874  | -0.336551 | -4.917839 | 125         | 6  | -5.390249 | -5.536776 | -1.878860 |
| 9           | 6  | 4.098155  | -0.892973 | -3.734140 | 126         | 6  | -5.831066 | -4.615197 | -2.975843 |
| 10          | 6  | 4.293796  | -3.697480 | 0.492826  | 127         | 1  | -6.759906 | -4.329119 | -2.784777 |
| 11          | 6  | 4.354516  | -5.077028 | 0.434854  | 128         | 1  | -5.850798 | -5.129960 | -3.823484 |
| 12          | 6  | 4.564434  | -5.885114 | 1.529619  | 129         | 6  | -3.131570 | -3.771298 | -3.288354 |
| 13          | 6  | 4.766951  | -5.320970 | 2.768320  | 130         | 1  | -3.074222 | -4.589647 | -2.735424 |
| 14          | 6  | 4.745599  | -3.948686 | 2.886160  | 131         | 1  | -2.895240 | -4.011288 | -4.218765 |
| 15          | 6  | 4.500296  | -3.190108 | 1.765887  | 132         | 6  | -2.147927 | -2.733444 | -2.766145 |
| 16          | 9  | 1.042086  | -2.299837 | -2.508712 | 133         | 1  | -2.256961 | -1.906348 | -3.297690 |
| 17          | 9  | 0.168617  | -1.156872 | -4.760214 | 134         | 1  | -1.230051 | -3.067961 | -2.926464 |
| 18          | 9  | 1.899191  | 0.140969  | -6.409232 | 135         | 6  | -4.684357 | 1.868434  | -1.145830 |
| 19          | 9  | 4.535297  | 0.300240  | -5.740903 | 136         | 6  | -4.939974 | 3.219671  | -1.285732 |
| 20          | 9  | 5.421025  | -0.745901 | -3.426102 | 137         | 6  | -4.855213 | 3.901266  | -2.494869 |
| 21          | 9  | 4.213130  | -5.701439 | -0.761741 | 138         | 6  | -4.483873 | 3.210132  | -3.634028 |
| 22          | 9  | 4.604578  | -7.230580 | 1.414257  | 139         | 6  | -4.267641 | 1.859522  | -3.549815 |
| 23          | 9  | 5.022352  | -6.092275 | 3.828108  | 140         | 6  | -4.356950 | 1.236211  | -2.334334 |
| 24          | 9  | 4.953870  | -3.381890 | 4.087652  | 141         | 6  | -4.874870 | 0.096607  | 2.541089  |
| 25          | 9  | 4.493766  | -1.833770 | 1.953005  | 142         | 6  | -3.869141 | -0.610916 | 3.168104  |
| 26          | 16 | 10.128238 | -2.362291 | -1.215024 | 143         | 6  | -3.990562 | -1.248696 | 4.387432  |
| 27          | 16 | 8.726252  | -3.691672 | 1.620673  | 144         | 6  | -5.195165 | -1.202721 | 5.042777  |
| 28          | 16 | 7.600694  | -3.186230 | -3.439182 | 145         | 6  | -6.233399 | -0.494427 | 4.478954  |
| 29          | 7  | 7.389604  | -5.072183 | -0.880393 | 146         | 6  | -6.049560 | 0.130616  | 3.272311  |
| 30          | 6  | 10.652737 | -3.917335 | -0.440273 | 147         | 9  | -5.276052 | 3.968005  | -0.207147 |
| 31          | 1  | 10.125161 | -4.667360 | -0.811541 | 148         | 9  | -5.109927 | 5.228541  | -2.564742 |
| 32          | 1  | 11.606824 | -4.083158 | -0.641123 | 149         | 9  | -4.337716 | 3.849065  | -4.800610 |
| 33          | 6  | 10.452169 | -3.850734 | 1.071325  | 150         | 9  | -3.964127 | 1.170984  | -4.664996 |
| 34          | 1  | 10.965868 | -3.079582 | 1.421366  | 151         | 9  | -4.077321 | -0.096609 | -2.321291 |
| 35          | 1  | 10.834939 | -4.670634 | 1.473502  | 152         | 9  | -2.642327 | -0.727531 | 2.561387  |
| 36          | 6  | 8.110164  | -5.376231 | 1.470024  | 153         | 9  | -2.956112 | -1.924949 | 4.932394  |
| 37          | 1  | 8.806593  | -5.979682 | 1.832965  | 154         | 9  | -5.374571 | -1.823359 | 6.213443  |
| 38          | 1  | 7.321499  | -5.457344 | 2.063590  | 155         | 9  | -7.417454 | -0.444946 | 5.117142  |
| 39          | 6  | 7.709587  | -5.912005 | 0.108414  | 156         | 9  | -7.121223 | 0.829336  | 2.789212  |
| 40          | 6  | 7.647410  | -7.289230 | -0.028409 | 157         | 79 | -2.285810 | 4.073057  | 1.541603  |
| 41          | 1  | 7.839101  | -7.858336 | 0.707711  | 158         | 79 | 1.438278  | 0.573115  | -0.231182 |
| 42          | 6  | 7.305021  | -7.816180 | -1.247243 | 159         | 81 | -7.972725 | 0.307005  | -0.009134 |
| 43          | 1  | 7.283677  | -8.756333 | -1.372497 | 160         | 81 | 0.999970  | 3.744900  | 0.889495  |

|    |    |            |           |           |     |    |           |           |           |
|----|----|------------|-----------|-----------|-----|----|-----------|-----------|-----------|
| 44 | 6  | 6.991818   | -6.967251 | -2.288380 | 161 | 6  | -2.824684 | 3.102589  | 3.259349  |
| 45 | 1  | 6.752231   | -7.317718 | -3.138693 | 162 | 6  | -4.128306 | 3.177182  | 3.700929  |
| 46 | 6  | 7.032610   | -5.595202 | -2.076625 | 163 | 6  | -4.579437 | 2.595112  | 4.885001  |
| 47 | 6  | 6.591927   | -4.673639 | -3.173675 | 164 | 6  | -3.687381 | 1.941076  | 5.683446  |
| 48 | 1  | 5.663094   | -4.387492 | -2.982684 | 165 | 6  | -2.358135 | 1.839885  | 5.296911  |
| 49 | 1  | 6.572218   | -5.188436 | -4.021296 | 166 | 6  | -1.975849 | 2.392671  | 4.100575  |
| 50 | 6  | 9.291500   | -3.829933 | -3.486041 | 167 | 6  | -1.888338 | 5.196671  | -0.129896 |
| 51 | 1  | 9.348757   | -4.648262 | -2.933073 | 168 | 6  | -1.813048 | 6.575566  | -0.073511 |
| 52 | 1  | 9.527876   | -4.069976 | -4.416426 | 169 | 6  | -1.630443 | 7.382095  | -1.174304 |
| 53 | 6  | 10.275177  | -2.792122 | -2.963808 | 170 | 6  | -1.472327 | 6.816611  | -2.418733 |
| 54 | 1  | 10.166234  | -1.965041 | -3.495395 | 171 | 6  | -1.510132 | 5.444729  | -2.535958 |
| 55 | 1  | 11.193042  | -3.126707 | -3.124053 | 172 | 6  | -1.727061 | 4.687977  | -1.408497 |
| 56 | 6  | 7.739179   | 1.809761  | -1.344430 | 173 | 9  | -5.055900 | 3.828322  | 2.973107  |
| 57 | 6  | 7.483718   | 3.161028  | -1.484321 | 174 | 9  | -5.867943 | 2.692746  | 5.251251  |
| 58 | 6  | 7.568429   | 3.842596  | -2.693476 | 175 | 9  | -4.097784 | 1.378730  | 6.844411  |
| 59 | 6  | 7.939552   | 3.151400  | -3.832668 | 176 | 9  | -1.485968 | 1.195062  | 6.092413  |
| 60 | 6  | 8.155622   | 1.800764  | -3.748462 | 177 | 9  | -0.664835 | 2.233435  | 3.750344  |
| 61 | 6  | 8.066371   | 1.177480  | -2.532963 | 178 | 9  | -1.910641 | 7.200753  | 1.126933  |
| 62 | 6  | 7.548605   | 0.038241  | 2.342626  | 179 | 9  | -1.574217 | 8.727069  | -1.059914 |
| 63 | 6  | 8.554207   | -0.669378 | 2.969737  | 180 | 9  | -1.243296 | 7.585918  | -3.485975 |
| 64 | 6  | 8.432672   | -1.306970 | 4.189152  | 181 | 9  | -1.345330 | 4.876281  | -3.743403 |
| 65 | 6  | 7.228079   | -1.260688 | 4.844492  | 182 | 9  | -1.752088 | 3.331929  | -1.595425 |
| 66 | 6  | 6.189971   | -0.552284 | 4.280574  | 183 | 16 | 3.984633  | 3.806996  | 1.391963  |
| 67 | 6  | 6.373921   | 0.072561  | 3.073845  | 184 | 16 | 2.505666  | 5.150141  | -1.397918 |
| 68 | 9  | 7.147857   | 3.909419  | -0.405708 | 185 | 16 | 1.536640  | 4.653765  | 3.695124  |
| 69 | 9  | 7.313875   | 5.169903  | -2.763338 | 186 | 7  | 1.261823  | 6.542243  | 1.144261  |
| 70 | 9  | 8.085657   | 3.790299  | -4.999275 | 187 | 6  | 4.498957  | 5.357174  | 0.601043  |
| 71 | 9  | 8.458921   | 1.112172  | -4.863668 | 188 | 1  | 3.990390  | 6.111914  | 0.988912  |
| 72 | 9  | 8.345831   | -0.155375 | -2.519934 | 189 | 1  | 5.460507  | 5.513902  | 0.771857  |
| 73 | 9  | 9.780999   | -0.786297 | 2.363034  | 190 | 6  | 4.250062  | 5.292904  | -0.903454 |
| 74 | 9  | 9.467002   | -1.983336 | 4.734204  | 191 | 1  | 4.745279  | 4.517149  | -1.269588 |
| 75 | 9  | 7.048562   | -1.881135 | 6.015242  | 192 | 1  | 4.627481  | 6.109359  | -1.317522 |
| 76 | 9  | 5.005927   | -0.502502 | 4.918756  | 193 | 6  | 1.910233  | 6.840164  | -1.227859 |
| 77 | 9  | 5.302384   | 0.771409  | 2.590653  | 194 | 1  | 2.600224  | 7.437363  | -1.612513 |
| 78 | 81 | 4.450784   | 0.248851  | -0.207621 | 195 | 1  | 1.103811  | 6.928857  | -1.796109 |
| 79 | 79 | -8.568984  | -2.512259 | -0.967491 | 196 | 6  | 1.557950  | 7.379459  | 0.145992  |
| 80 | 79 | -4.759624  | 0.953583  | 0.683700  | 197 | 6  | 1.512775  | 8.757137  | 0.284907  |
| 81 | 81 | -5.261267  | -2.214182 | -0.420277 | 198 | 1  | 1.686192  | 9.324851  | -0.456670 |
| 82 | 81 | -1.746545  | 1.249409  | 0.564818  | 199 | 6  | 1.213837  | 9.286458  | 1.514102  |
| 83 | 6  | -9.153335  | -1.536732 | -2.667410 | 200 | 1  | 1.205054  | 10.226790 | 1.640275  |
| 84 | 6  | -10.470950 | -1.599098 | -3.067393 | 201 | 6  | 0.926050  | 8.439981  | 2.564531  |
| 85 | 6  | -10.954225 | -1.012754 | -4.236699 | 202 | 1  | 0.716667  | 8.792035  | 3.421908  |
| 86 | 6  | -10.082273 | -0.366714 | -5.063364 | 203 | 6  | 0.947777  | 7.068254  | 2.351291  |
| 87 | 6  | -8.740504  | -0.277857 | -4.719412 | 204 | 6  | 0.533912  | 6.150541  | 3.461796  |
| 88 | 6  | -8.325121  | -0.834400 | -3.535806 | 205 | 1  | -0.403130 | 5.872978  | 3.300548  |
| 89 | 6  | -8.128860  | -3.639437 | 0.690745  | 206 | 1  | 0.546035  | 6.665413  | 4.309514  |
| 90 | 6  | -8.067751  | -5.018959 | 0.632558  | 207 | 6  | 3.233817  | 5.281906  | 3.688588  |
| 91 | 6  | -7.857589  | -5.827156 | 1.727194  | 208 | 1  | 3.280914  | 6.099839  | 3.134077  |

|     |    |            |           |           |     |   |           |           |           |
|-----|----|------------|-----------|-----------|-----|---|-----------|-----------|-----------|
| 92  | 6  | -7.655212  | -5.263148 | 2.965979  | 209 | 1 | 3.501742  | 5.519680  | 4.610971  |
| 93  | 6  | -7.676950  | -3.890889 | 3.084033  | 210 | 6 | 4.190991  | 4.235317  | 3.135261  |
| 94  | 6  | -7.922483  | -3.132205 | 1.963882  | 211 | 1 | 4.091351  | 3.409225  | 3.670016  |
| 95  | 9  | -11.380987 | -2.241796 | -2.310484 | 212 | 1 | 5.116494  | 4.561409  | 3.266449  |
| 96  | 9  | -12.254659 | -1.098612 | -4.561795 | 213 | 6 | 1.562778  | -0.342636 | 1.595320  |
| 97  | 9  | -10.524289 | 0.199668  | -6.210681 | 214 | 6 | 1.298785  | -1.691272 | 1.743534  |
| 98  | 9  | -7.888180  | 0.359151  | -5.542412 | 215 | 6 | 1.415130  | -2.373722 | 2.949558  |
| 99  | 9  | -7.002258  | -0.687216 | -3.227788 | 216 | 6 | 1.829045  | -1.686296 | 4.076218  |
| 100 | 9  | -8.208979  | -5.643223 | -0.564133 | 217 | 6 | 2.055285  | -0.337870 | 3.985198  |
| 101 | 9  | -7.817067  | -7.172593 | 1.611621  | 218 | 6 | 1.933447  | 0.286398  | 2.773038  |
| 102 | 9  | -7.399577  | -6.034547 | 4.025643  | 219 | 6 | 1.272241  | 1.431244  | -2.084187 |
| 103 | 9  | -7.468820  | -3.324222 | 4.285611  | 220 | 6 | 2.264491  | 2.129341  | -2.742884 |
| 104 | 9  | -7.929394  | -1.775898 | 2.151212  | 221 | 6 | 2.110732  | 2.768266  | -3.958069 |
| 105 | 16 | -2.294778  | -2.303695 | -1.017333 | 222 | 6 | 0.885561  | 2.733819  | -4.575080 |
| 106 | 16 | -3.696486  | -3.633286 | 1.818403  | 223 | 6 | -0.141090 | 2.035528  | -3.978520 |
| 107 | 16 | -4.822416  | -3.127710 | -3.241356 | 224 | 6 | 0.074764  | 1.408787  | -2.778076 |
| 108 | 7  | -5.033210  | -5.013783 | -0.682631 | 225 | 9 | 0.921482  | -2.436240 | 0.676313  |
| 109 | 6  | -1.770124  | -3.858735 | -0.242681 | 226 | 9 | 1.150214  | -3.698638 | 3.027719  |
| 110 | 1  | -2.297675  | -4.608780 | -0.613945 | 227 | 9 | 2.005833  | -2.326730 | 5.237841  |
| 111 | 1  | -0.816039  | -4.024487 | -0.443601 | 228 | 9 | 2.400395  | 0.347392  | 5.090132  |
| 112 | 6  | -1.970595  | -3.792210 | 1.268933  | 229 | 9 | 2.225307  | 1.616473  | 2.750864  |
| 113 | 1  | -1.456924  | -3.021039 | 1.618971  | 230 | 9 | 3.510878  | 2.234031  | -2.175378 |
| 114 | 1  | -1.587744  | -4.612102 | 1.671051  | 231 | 9 | 3.133973  | 3.434667  | -4.535370 |
| 115 | 6  | -4.312473  | -5.317880 | 1.667726  | 232 | 9 | 0.675178  | 3.356280  | -5.739605 |
| 116 | 1  | -3.615979  | -5.921299 | 2.030595  | 233 | 9 | -1.344953 | 1.997517  | -4.579116 |
| 117 | 1  | -5.101093  | -5.399069 | 2.261341  | 234 | 9 | -0.987613 | 0.720260  | -2.261289 |

---

**Table S2.** Selected NBO charges  $Q$  ( $|e|$ ) calculated for **4'** in the gas phase (labelling scheme as in Figure S7).

|                  | $Q$    |
|------------------|--------|
| Tl1 <sub>A</sub> | 0.543  |
| Tl2 <sub>A</sub> | 0.819  |
| Au1 <sub>A</sub> | 0.157  |
| Au2 <sub>A</sub> | 0.214  |
| Tl1 <sub>B</sub> | 0.586  |
| Tl2 <sub>B</sub> | 0.866  |
| Au1 <sub>B</sub> | -0.054 |
| Au2 <sub>B</sub> | 0.174  |
| Tl1 <sub>C</sub> | 0.548  |
| Tl2 <sub>C</sub> | 0.944  |
| Au1 <sub>C</sub> | 0.159  |
| Au2 <sub>C</sub> | -0.049 |
